# Supplementary material for: Genetic evidence of Coxiella burnetii infection in acute febrile illnesses in Iran
Source: PubMed Central journal article supplement (PMC6386404; doi:10.1371/journal.pntd.0007181), 2019-02-11
Supplement: pntd.0007181.s002.pdf [file pntd.0007181.s002.pdf]

## Acute Q Fever Questionnaire

|                                                                                                                                                                                                                                                                                                                                                                                                                                                                                                                                                                           |                                                                       |                                                                                   |
|---------------------------------------------------------------------------------------------------------------------------------------------------------------------------------------------------------------------------------------------------------------------------------------------------------------------------------------------------------------------------------------------------------------------------------------------------------------------------------------------------------------------------------------------------------------------------|-----------------------------------------------------------------------|-----------------------------------------------------------------------------------|
| Questionnaire Code:                                                                                                                                                                                                                                                                                                                                                                                                                                                                                                                                                       | Hospital or Health Center name:                                       |                                                                                   |
| Name of physician:                                                                                                                                                                                                                                                                                                                                                                                                                                                                                                                                                        | Name of the Questioner:                                               | Date:                                                                             |
| Patient's name:                                                                                                                                                                                                                                                                                                                                                                                                                                                                                                                                                           | Address and contact number:                                           |                                                                                   |
| Age: ..... years                                                                                                                                                                                                                                                                                                                                                                                                                                                                                                                                                          | Gender: Male <input type="checkbox"/> Female <input type="checkbox"/> | Marriage Status: Single <input type="checkbox"/> Married <input type="checkbox"/> |
| Location Area: Rural <input type="checkbox"/> City <input type="checkbox"/>                                                                                                                                                                                                                                                                                                                                                                                                                                                                                               | Occupation:                                                           |                                                                                   |
| Is the job this person is at high risk for Q fever? Yes <input type="checkbox"/> No <input type="checkbox"/><br><b>Note:</b> Professionals who are in contact with animals or their products (veterinarians, dairy farmers, butchers), work in laboratories and ... is a high-risk occupation.                                                                                                                                                                                                                                                                            |                                                                       |                                                                                   |
| What is the reason for the current referral to the doctor? .....                                                                                                                                                                                                                                                                                                                                                                                                                                                                                                          |                                                                       |                                                                                   |
| When did the symptoms begin? Day ..... Month ..... Year .....                                                                                                                                                                                                                                                                                                                                                                                                                                                                                                             |                                                                       |                                                                                   |
| Has the patient fever in the last few days? Yes <input type="checkbox"/> No <input type="checkbox"/>                                                                                                                                                                                                                                                                                                                                                                                                                                                                      |                                                                       |                                                                                   |
| Does the patient have fever now? Yes <input type="checkbox"/> No <input type="checkbox"/> If the answer is yes, the fever will be recorded: ..... C                                                                                                                                                                                                                                                                                                                                                                                                                       |                                                                       |                                                                                   |
| Which of the following symptoms does the patient have? (According to patient's report and clinical examination)                                                                                                                                                                                                                                                                                                                                                                                                                                                           |                                                                       |                                                                                   |
| Headache <input type="checkbox"/> Chills <input type="checkbox"/> Chest pain <input type="checkbox"/> Cough <input type="checkbox"/> Fatigue and weakness <input type="checkbox"/><br>Chest pain <input type="checkbox"/> Diarrhea <input type="checkbox"/> Acute infection of the lower respiratory tract <input type="checkbox"/> Lethargy <input type="checkbox"/><br>Myalgia <input type="checkbox"/> Atypical pneumonia <input type="checkbox"/> Shortness of Breath <input type="checkbox"/> Arthralgia <input type="checkbox"/> Hepatitis <input type="checkbox"/> |                                                                       |                                                                                   |
| Do you have a history of keeping domestic animals (including livestock and pets) in the last 2 months?<br>Yes <input type="checkbox"/> No <input type="checkbox"/>                                                                                                                                                                                                                                                                                                                                                                                                        |                                                                       |                                                                                   |
| If you have a history of keeping domestic animals, what is the type?<br>Sheep <input type="checkbox"/> Goat <input type="checkbox"/> Cattle <input type="checkbox"/> Pigeon <input type="checkbox"/> Dogs <input type="checkbox"/> Cat <input type="checkbox"/> Horse <input type="checkbox"/> Other items (listed) ..... <input type="checkbox"/>                                                                                                                                                                                                                        |                                                                       |                                                                                   |
| Is your place of residence in areas close to the keeping and breeding of livestock animal? Yes <input type="checkbox"/> No <input type="checkbox"/>                                                                                                                                                                                                                                                                                                                                                                                                                       |                                                                       |                                                                                   |
| Do you have a history of raw milk and other non-pasteurized dairy products consumption? Yes <input type="checkbox"/> No <input type="checkbox"/>                                                                                                                                                                                                                                                                                                                                                                                                                          |                                                                       |                                                                                   |
| Do you have a recent history of abortion? Yes <input type="checkbox"/> No <input type="checkbox"/>                                                                                                                                                                                                                                                                                                                                                                                                                                                                        |                                                                       |                                                                                   |

|                                                                                                                                                                                                                             |
|-----------------------------------------------------------------------------------------------------------------------------------------------------------------------------------------------------------------------------|
| Do you have a recent history of tick bites? Yes <input type="checkbox"/> No <input type="checkbox"/>                                                                                                                        |
| Have you recently contacted a newborn or aborted animal? Yes <input type="checkbox"/> No <input type="checkbox"/>                                                                                                           |
| Have you recently received antibiotics? Yes <input type="checkbox"/> No <input type="checkbox"/><br>If the answer is positive, type it: .....                                                                               |
| Laboratory findings (if available):<br>Blood culture: .....<br>Biochemicals: .....<br>Hematology: .....<br>Radiography: .....                                                                                               |
| Study data is given to the all individuals. Does the patient consent to participate in the study?<br>Yes <input type="checkbox"/> No <input type="checkbox"/> If the answer is Yes, the patient must sign the consent form. |
